# Supplementary material for: Pharmacokinetics and Tissue Distribution of Enavogliflozin in Mice and Rats
Source: MDPI journal article supplement (doi:10.3390/pharmaceutics14061210), 2022-06-07
Supplement: s1 [file s1]

Supplementary File

# Pharmacokinetics and tissue distribution of enavogliflozin in mice and rats

Minyeong Pang<sup>1</sup>, So Yeon Jeon<sup>1</sup>, Min-Koo Choi<sup>1</sup>, Ji-Hyeon Jeon<sup>2</sup>, Hye-Young Ji<sup>3</sup>, Ji-Soo Choi<sup>3</sup>, and Im-Sook Song<sup>2,\*</sup>

The normal distribution of the data was assessed using the Shapiro-Wilk test for the pharmacokinetic parameters of enavogliflozin in both mice and rats following intravenous and oral administration of enavogliflozin (0.3, 1, and 3 mg/kg). SPSS for Windows software (version 25.0; IBM Corp., Armonk, NY, USA) were used and a difference was considered significant at  $p < 0.05$ .

**Citation:** Pang, M.; Jeon, S.Y.; Choi, M.-K.; Jeon, J.-H.; Ji, H.-Y.; Choi, J.-S.; Song, I.-S. Pharmacokinetics and Tissue Distribution of Enavogliflozin in Mice and Rats. *Pharmaceutics* **2022**, *14*, 1210. <https://doi.org/10.3390/pharmaceutics14061210>

Academic Editor: José Martínez Lanao

Received: 1 May 2022

Accepted: 6 June 2022

Published: 7 June 2022

**Publisher's Note:** MDPI stays neutral with regard to jurisdictional claims in published maps and institutional affiliations.

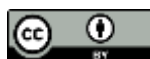

**Copyright:** © 2022 by the authors. Licensee MDPI, Basel, Switzerland. This article is an open access article distributed under the terms and conditions of the Creative Commons Attribution (CC BY) license (<https://creativecommons.org/licenses/by/4.0/>).

**Table S1.** P values and Q-Q plot from the normality test for the pharmacokinetic parameters of enavogliflozin in mice following its intravenous administration using the Shapiro-Wilk test.

| Parameters          |          | Dose (mg/kg)                                                                        |                                                                                      |                                                                                       |
|---------------------|----------|-------------------------------------------------------------------------------------|--------------------------------------------------------------------------------------|---------------------------------------------------------------------------------------|
|                     |          | 0.3                                                                                 | 1                                                                                    | 3                                                                                     |
| AUC <sub>∞</sub> /D | P value  | 0.542                                                                               | 0.915                                                                                | 0.442                                                                                 |
|                     | Q-Q plot | 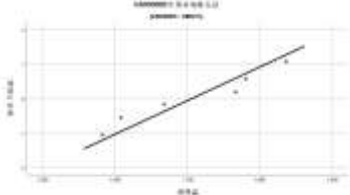   |    |    |
| C <sub>0</sub> /D   | P value  | 0.874                                                                               | 0.098                                                                                | 0.645                                                                                 |
|                     | Q-Q plot |    |    |    |
| CL                  | P value  | 0.521                                                                               | 0.368                                                                                | 0.562                                                                                 |
|                     | Q-Q plot |  |  |  |
| V <sub>dss</sub>    | P value  | 0.591                                                                               | 0.342                                                                                | 0.111                                                                                 |
|                     | Q-Q plot |  |  |  |
| T <sub>1/2</sub>    | P value  | 0.843                                                                               | 0.587                                                                                | 0.454                                                                                 |
|                     | Q-Q plot |  |  |  |
| MRT                 | P value  | 0.913                                                                               | 0.524                                                                                | 0.807                                                                                 |
|                     | Q-Q plot |  |  |  |

**Table S2.** P values and Q-Q plot from the normality test for the pharmacokinetic parameters of enavogliflozin in mice following its oral administration using the Shapiro-Wilk test.

| Parameters          |          | Dose (mg/kg)                                                                        |                                                                                      |                                                                                       |
|---------------------|----------|-------------------------------------------------------------------------------------|--------------------------------------------------------------------------------------|---------------------------------------------------------------------------------------|
|                     |          | 0.3                                                                                 | 1                                                                                    | 3                                                                                     |
| AUC <sub>∞</sub> /D | P value  | 0.405                                                                               | 0.809                                                                                | 0.758                                                                                 |
|                     | Q-Q plot | 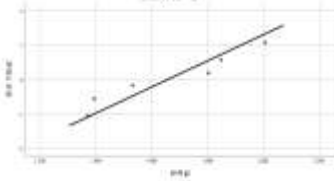   |    |    |
| C <sub>max</sub> /D | P value  | 0.455                                                                               | 0.292                                                                                | 0.982                                                                                 |
|                     | Q-Q plot |    |    |    |
| T <sub>max</sub>    | P value  | 0.184                                                                               | 0.197                                                                                | 0.081                                                                                 |
|                     | Q-Q plot |  |  |  |
| T <sub>1/2</sub>    | P value  | 0.456                                                                               | 0.139                                                                                | 0.79                                                                                  |
|                     | Q-Q plot |  |  |  |
| MRT                 | P value  | 0.876                                                                               | 0.423                                                                                | 0.196                                                                                 |
|                     | Q-Q plot |  |  |  |

**Table S3.** P values and Q-Q plot from the normality test for the pharmacokinetic parameters of enavogliflozin in rats following its intravenous administration using the Shapiro-Wilk test.

| Parameters          |          | Dose (mg/kg)                                                                        |                                                                                      |                                                                                       |
|---------------------|----------|-------------------------------------------------------------------------------------|--------------------------------------------------------------------------------------|---------------------------------------------------------------------------------------|
|                     |          | 0.3                                                                                 | 1                                                                                    | 3                                                                                     |
| AUC <sub>∞</sub> /D | P value  | 0.278                                                                               | 0.704                                                                                | 0.315                                                                                 |
|                     | Q-Q plot | 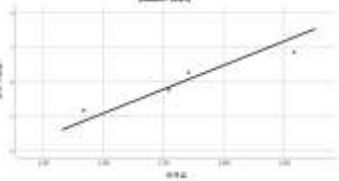   |    |    |
| C <sub>0</sub> /D   | P value  | 0.280                                                                               | 0.105                                                                                | 0.808                                                                                 |
|                     | Q-Q plot |    |    |    |
| CL                  | P value  | 0.891                                                                               | 0.133                                                                                | 0.156                                                                                 |
|                     | Q-Q plot |  |  |  |
| V <sub>dss</sub>    | P value  | 0.559                                                                               | 0.065                                                                                | 0.524                                                                                 |
|                     | Q-Q plot |  |  |  |
| T <sub>1/2</sub>    | P value  | 0.278                                                                               | 0.704                                                                                | 0.315                                                                                 |
|                     | Q-Q plot |  |  |  |
| MRT                 | P value  | 0.663                                                                               | 0.206                                                                                | 0.976                                                                                 |
|                     | Q-Q plot |  |  |  |

**Table S4.** P values and Q-Q plot from the normality test for the pharmacokinetic parameters of enavogliflozin in rats following its oral administration using the Shapiro-Wilk test.

| Parameters          |          | Dose (mg/kg)                                                                        |                                                                                      |                                                                                       |
|---------------------|----------|-------------------------------------------------------------------------------------|--------------------------------------------------------------------------------------|---------------------------------------------------------------------------------------|
|                     |          | 0.3                                                                                 | 1                                                                                    | 3                                                                                     |
| AUC <sub>∞</sub> /D | P value  | 0.132                                                                               | 0.606                                                                                | 0.580                                                                                 |
|                     | Q-Q plot | 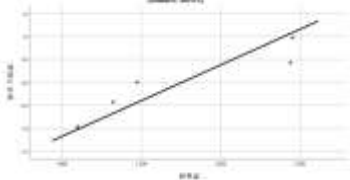   |    |    |
| C <sub>max</sub> /D | P value  | 0.471                                                                               | 0.124                                                                                | 0.887                                                                                 |
|                     | Q-Q plot |    |    |    |
| T <sub>max</sub>    | P value  | 0.149                                                                               | 0.070                                                                                | 0.613                                                                                 |
|                     | Q-Q plot |   |   |   |
| T <sub>1/2</sub>    | P value  | 0.261                                                                               | 0.455                                                                                | 0.053                                                                                 |
|                     | Q-Q plot |  |  |  |
| MRT                 | P value  | 0.731                                                                               | 0.178                                                                                | 0.099                                                                                 |
|                     | Q-Q plot |  |  |  |

**Table S5.** P values and Q-Q plot from the normality test for AUC values and AUC ratios of enavogliflozin in various tissues after single or repeated oral doses (1 mg/kg) of enavogliflozin in mice using the Shapiro-Wilk test.

| Tissue          |          | AUC <sub>48h</sub> (µg·h/mL for plasma or µg·h/g tissue)                            |                                                                                      |                                                                                       |
|-----------------|----------|-------------------------------------------------------------------------------------|--------------------------------------------------------------------------------------|---------------------------------------------------------------------------------------|
|                 |          | Single dose                                                                         | Repeated dose for 7 days                                                             | Repeated dose for 14 days                                                             |
| Plasma          | P value  | 0.644                                                                               | 0.938                                                                                | 0.165                                                                                 |
|                 | Q-Q plot | 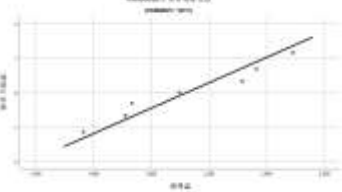   |    |    |
| Kidney          | P value  | 0.966                                                                               | 0.151                                                                                | 0.453                                                                                 |
|                 | Q-Q plot |    |    |    |
| Liver           | P value  | 0.123                                                                               | 0.199                                                                                | 0.711                                                                                 |
|                 | Q-Q plot |  |  |  |
| Small intestine | P value  | 0.410                                                                               | 0.458                                                                                | 0.078                                                                                 |
|                 | Q-Q plot |  |  |  |
| Large intestine | P value  | 0.746                                                                               | 0.244                                                                                | 0.191                                                                                 |
|                 | Q-Q plot |  |  |  |
| Tissue          |          | AUC ratio                                                                           |                                                                                      |                                                                                       |
| Kidney          | P value  | 0.618                                                                               | 0.446                                                                                | 0.646                                                                                 |
|                 | Q-Q plot |  |  |  |

|                 |                                                                                                                                                                    |                                                                                             |                                                                                              |
|-----------------|--------------------------------------------------------------------------------------------------------------------------------------------------------------------|---------------------------------------------------------------------------------------------|----------------------------------------------------------------------------------------------|
| Liver           | P value<br>Q-Q plot<br><br><div data-bbox="379 241 719 481"> <p>0.883</p> 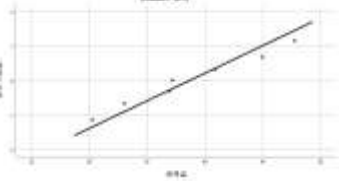 </div> | 0.623<br> | 0.134<br> |
| Small intestine | 0.264<br>                                                                         | 0.055<br> | 0.164<br> |
| Large intestine | 0.320<br>                                                                         | 0.138<br> | 0.437<br> |
